# Supplementary material for: Contribution of carbonatite and recycled oceanic crust to petit-spot lavas on the western Pacific Plate
Source: Copernicus journal article supplement (doi:10.5194/se-15-167-2024), 2024-02-08
Supplement: Supplementary file 1 [file se-15-167-2024-supplement.zip]

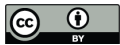

*Supplement of*

**Contribution of carbonatite and recycled oceanic crust  
to petit-spot lavas on the western Pacific Plate**

**Kazuto Mikuni et al.**

*Correspondence to:* Kazuto Mikuni ([kazuto.mikuni@aist.go.jp](mailto:kazuto.mikuni@aist.go.jp))

- [se-15-167-2024-supplement-title-page.pdf](#)
- [Supplement\\_Mikuni\\_et\\_al.pdf](#)
- [Tables\\_mikuni\\_et\\_al.xlsx](#)

The copyright of individual parts of the supplement might differ from the article licence.
